# Supplementary material for: Neuronal wiring diagram of an adult brain
Source: PubMed Central journal article supplement (PMC11446842; doi:10.1038/s41586-024-07558-y), 2024-10-02
Supplement: 41586_2024_7558_MOESM3_ESM.pdf [file 41586_2024_7558_MOESM3_ESM.pdf]

## Supplementary Note

### FlyWire Consortium

Krzysztof Kruk<sup>3</sup>, Doug Bland<sup>1</sup>, Zairene Lenizo<sup>16</sup>, Austin T. Burke<sup>1</sup>, Kyle Patrick Willie<sup>1</sup>, Alexander Shakeel Bates<sup>4,5,12,13</sup>, Nikitas Serafetinidis<sup>3</sup>, Nashra Hadjerol<sup>16</sup>, Ryan Willie<sup>1</sup>, Katharina Eichler<sup>5</sup>, Ben Silverman<sup>1</sup>, John Anthony Ocho<sup>16</sup>, Joshua Bañez<sup>16</sup>, Yijie Yin<sup>5</sup>, Rey Adrian Candilada<sup>16</sup>, Sven Dorkenwald<sup>1,2</sup>, Jay Gager<sup>1</sup>, Anne Kristiansen<sup>3</sup>, Nelsie Panes<sup>16</sup>, Arti Yadav<sup>17</sup>, Remer Tancontian<sup>16</sup>, Shirleyjoy Serona<sup>16</sup>, Jet Ivan Dolorosa<sup>16</sup>, Kendrick Joules Vinson<sup>16</sup>, Dustin Garner<sup>18</sup>, Regine Salem<sup>16</sup>, Ariel Dagohoy<sup>16</sup>, Philipp Schlegel<sup>4,5</sup>, Jaime Skelton<sup>3</sup>, Mendell Lopez<sup>16</sup>, Laia Serratos Capdevila<sup>5</sup>, Griffin Badalamente<sup>5</sup>, Thomas Stocks<sup>3</sup>, Anjali Pandey<sup>17</sup>, Darrel Jay Akiatan<sup>16</sup>, James Hebditch<sup>1</sup>, Celia David<sup>1</sup>, Dharini Sapkal<sup>17</sup>, Shaina Mae Monungolh<sup>16</sup>, Varun Sane<sup>5</sup>, Mark Lloyd Pielago<sup>16</sup>, Miguel Albero<sup>16</sup>, Jacquilyn Laude<sup>16</sup>, Márcia dos Santos<sup>5</sup>, David Deutsch<sup>1,9</sup>, Zeba Vohra<sup>17</sup>, Kaiyu Wang<sup>14</sup>, Allien Mae Gogo<sup>16</sup>, Emil Kind<sup>19</sup>, Alvin Josh Mandahay<sup>16</sup>, Chereb Martinez<sup>16</sup>, John David Asis<sup>16</sup>, Chitra Nair<sup>17</sup>, Dhwani Patel<sup>17</sup>, Marchan Manaytay<sup>16</sup>, Imaan F. M. Tamimi<sup>5</sup>, Clyde Angelo Lim<sup>16</sup>, Philip Lenard Ampo<sup>16</sup>, Michelle Darapan Pantujan<sup>16</sup>, Alexandre Javier<sup>5</sup>, Daril Bautista<sup>16</sup>, Rashmita Rana<sup>17</sup>, Jansen Seguido<sup>16</sup>, Bhargavi Parmar<sup>17</sup>, John Clyde Saguimpa<sup>16</sup>, Merlin Moore<sup>1</sup>, Markus William Pleijzier<sup>4</sup>, Mark Larson<sup>20</sup>, Joseph Hsu<sup>5</sup>, Itisha Joshi<sup>17</sup>, Dhara Kakadiya<sup>17</sup>, Amalia Braun<sup>21</sup>, Cathy Pilapil<sup>16</sup>, Marina Gkantia<sup>5</sup>, Kaushik Parmar<sup>17</sup>, Quinn Vanderbeck<sup>12</sup>, Claire E. McKellar<sup>1</sup>, Irene Salgarella<sup>5</sup>, Christopher Dunne<sup>5</sup>, Eva Munnelly<sup>5</sup>, Chan Hyuk Kang<sup>22</sup>, Lena Lörsch<sup>27</sup>, Jinmook Lee<sup>22</sup>, Lucia Kmecova<sup>24</sup>, Gizem Sancer<sup>23</sup>, Christa Baker<sup>1</sup>, Szi-chieh Yu<sup>1</sup>, Jenna Joroff<sup>12</sup>, Steven Calle<sup>24</sup>, Yashvi Patel<sup>17</sup>, Olivia Sato<sup>20</sup>, Siqi Fang<sup>5</sup>, Janice Salocot<sup>16</sup>, Farzaan Salman<sup>26</sup>, Sebastian Molina-Obando<sup>27</sup>, Paul Brooks<sup>5</sup>, Mai Bui<sup>25</sup>, Matthew Lichtenberger<sup>3</sup>, Edmark Tamboboy<sup>16</sup>, Katie Molloy<sup>20</sup>, Alexis E Santana-Cruz<sup>24</sup>, Anthony Hernandez<sup>3</sup>, Seongbong Yu<sup>22</sup>, Marissa Sorek<sup>1,3</sup>, Arzoo Diwan<sup>17</sup>, Monika Patel<sup>17</sup>, Travis R. Aiken<sup>3</sup>, Sarah Morejohn<sup>1</sup>, Sanna Koskela<sup>14</sup>, Tansy Yang<sup>14</sup>, Daniel Lehmann<sup>3</sup>, Jonas Chojetzki<sup>27</sup>, Sangeeta Sisodiya<sup>17</sup>, Selden Koolman<sup>1</sup>, Philip K. Shiu<sup>28</sup>, Sky Cho<sup>25</sup>, Annika Bast<sup>27</sup>, Brian Reicher<sup>20</sup>, Marlon Blanquart<sup>5</sup>, Lucy Houghton<sup>18</sup>, Hyungjun Choi<sup>22</sup>, Maria Ioannidou<sup>27</sup>, Matt Collie<sup>20</sup>, Joanna Eckhardt<sup>1</sup>, Benjamin Gorko<sup>18</sup>, Li Guo<sup>18</sup>, Zhihao Zheng<sup>1</sup>, Alisa Poh<sup>29</sup>, Marina Lin<sup>25</sup>, István Taisz<sup>4</sup>, Wes Murfin<sup>53</sup>, Álvaro Sanz Díez<sup>37</sup>, Nils Reinhard<sup>30</sup>, Peter Gibb<sup>12</sup>, Nidhi Patel<sup>17</sup>, Sandeep Kumar<sup>1</sup>, Minsik Yun<sup>31</sup>, Megan Wang<sup>1</sup>, Devon Jones<sup>1</sup>, Lucas Encarnacion-Rivera<sup>32</sup>, Annalena Oswald<sup>27</sup>, Akanksha Jadia<sup>17</sup>, Mert Erginkaya<sup>33</sup>, Nik Drummond<sup>5</sup>, Leonie Walter<sup>19</sup>, Ibrahim Tastekin<sup>33</sup>, Xin Zhong<sup>19</sup>, Yuta Mabuchi<sup>34</sup>, Fernando J. Figueroa Santiago<sup>24</sup>, Urja Verma<sup>17</sup>, Nick Byrne<sup>20</sup>, Edda Kunze<sup>19</sup>, Thomas Crahan<sup>18</sup>, Ryan Margossian<sup>3</sup>, Haein Kim<sup>34</sup>, Iliyan Georgiev<sup>3</sup>, Fabianna Szorenyi<sup>24</sup>, Atsuko Adachi<sup>37</sup>, Benjamin Barger<sup>35</sup>, Tomke Stuermer<sup>4,5</sup>, Damian Demarest<sup>36</sup>, Burak Gür<sup>27</sup>, Andrea N. Becker<sup>3</sup>, Robert Turnbull<sup>5</sup>,

Ashley Morren<sup>3</sup>, Andrea Sandoval<sup>28</sup>, Anthony Moreno-Sanchez<sup>38</sup>, Diego A. Pacheco<sup>12</sup>, Eleni Samara<sup>21</sup>, Haley Croke<sup>38</sup>, Alexander Thomson<sup>14</sup>, Connor Laughland<sup>14</sup>, Suchetana B. Dutta<sup>19</sup>, Paula Guiomar Alarcón de Antón<sup>19</sup>, Binglin Huang<sup>18</sup>, Patricia Pujols<sup>24</sup>, Isabel Haber<sup>20</sup>, Amanda González-Segarra<sup>28</sup>, Albert Lin<sup>1,6</sup>, Daniel T. Choe<sup>39</sup>, Veronika Lukyanova<sup>40</sup>, Marta Costa<sup>5</sup>, Nino Mancini<sup>35</sup>, Zequan Liu<sup>41</sup>, Tatsuo Okubo<sup>12</sup>, Miriam A. Flynn<sup>14</sup>, Gianna Vitelli<sup>35</sup>, Meghan Laturney<sup>28</sup>, Feng Li<sup>14</sup>, Shuo Cao<sup>42</sup>, Carolina Manyari-Diaz<sup>35</sup>, Hyunsoo Yim<sup>39</sup>, Anh Duc Le<sup>38</sup>, Kate Maier<sup>35</sup>, Seungyun Yu<sup>22</sup>, Yeonju Nam<sup>22</sup>, Daniel Băba<sup>3</sup>, Amanda Abusaif<sup>28</sup>, Audrey Francis<sup>43</sup>, Jesse Gayk<sup>17</sup>, Sommer S. Huntress<sup>44</sup>, Raquel Barajas<sup>33</sup>, Mindy Kim<sup>20</sup>, Xinyue Cui<sup>34</sup>, Amy R. Sterling<sup>1,3</sup>, Gabriella R. Sterne<sup>28</sup>, Anna Li<sup>12</sup>, Keehyun Park<sup>22</sup>, Georgia Dempsey<sup>5</sup>, Alan Mathew<sup>5</sup>, Jinseong Kim<sup>22</sup>, Taewan Kim<sup>22</sup>, Guan-ting Wu<sup>45</sup>, Serene Dhawan<sup>46</sup>, Margarida Brotas<sup>33</sup>, Cheng-hao Zhang<sup>45</sup>, Shanice Bailey<sup>5</sup>, Alexander Del Toro<sup>28</sup>, Arie Matsliah<sup>1</sup>, Kisuk Lee<sup>1,10</sup>, Thomas Macrina<sup>1,2</sup>, Casey Schneider-Mizell<sup>7</sup>, Sergiy Popovych<sup>1,2</sup>, Oluwaseun Ogedengbe<sup>1</sup>, Runzhe Yang<sup>1</sup>, Akhilesh Halageri<sup>1</sup>, Will Silversmith<sup>1</sup>, Stephan Gerhard<sup>47</sup>, Andrew Champion<sup>4,5</sup>, Nils Eckstein<sup>14</sup>, Dodam Ih<sup>1</sup>, Nico Kemnitz<sup>1</sup>, Manuel Castro<sup>1</sup>, Zhen Jia<sup>1</sup>, Jingpeng Wu<sup>1</sup>, Eric Mitchell<sup>1</sup>, Barak Nehoran<sup>1,2</sup>, Shang Mu<sup>1</sup>, J. Alexander Bae<sup>1,11</sup>, Ran Lu<sup>1</sup>, Eric Perlman<sup>8</sup>, Ryan Morey<sup>1</sup>, Kai Kuehner<sup>1</sup>, Derrick Brittain<sup>7</sup>, Chris S. Jordan<sup>1</sup>, David J. Anderson<sup>42</sup>, Rudy Behnia<sup>37</sup>, Salil S. Bidaye<sup>35</sup>, Davi D. Bock<sup>15</sup>, Alexander Borst<sup>21</sup>, Eugenia Chiappe<sup>33</sup>, Forrest Collman<sup>7</sup>, Kenneth J. Colodner<sup>44</sup>, Andrew Dacks<sup>26</sup>, Barry Dickson<sup>14</sup>, Jan Funke<sup>14</sup>, Denise Garcia<sup>38</sup>, Stefanie Hampel<sup>24</sup>, Volker Hartenstein<sup>48</sup>, Bassem Hassan<sup>19</sup>, Charlotte Helfrich-Forster<sup>30</sup>, Wolf Huetteroth<sup>49</sup>, Gregory S.X.E. Jefferis<sup>4,5</sup>, Jinseop Kim<sup>22</sup>, Sung Soo Kim<sup>18</sup>, Young-Joon Kim<sup>31</sup>, Jae Young Kwon<sup>22</sup>, Wei-Chung Lee<sup>12</sup>, Gerit A. Linneweber<sup>19</sup>, Gaby Maimon<sup>43</sup>, Richard Mann<sup>37</sup>, Mala Murthy<sup>1</sup>, Stéphane Noselli<sup>52</sup>, Michael Pankratz<sup>36</sup>, Lucia Prieto-Godino<sup>46</sup>, Jenny Read<sup>40</sup>, Michael Reiser<sup>14</sup>, Katie von Reyn<sup>38</sup>, Carlos Ribeiro<sup>33</sup>, Kristin Scott<sup>28</sup>, Andrew M. Seeds<sup>24</sup>, Mareike Selcho<sup>49</sup>, H. Sebastian Seung<sup>1,2</sup>, Marion Silies<sup>27</sup>, Julie Simpson<sup>18</sup>, Scott Waddell<sup>54</sup>, Mathias F. Wernet<sup>19</sup>, Rachel I. Wilson<sup>12</sup>, Fred W. Wolf<sup>50</sup>, Zepeng Yao<sup>51</sup>, Nilay Yapici<sup>34</sup>, Meet Zandawala<sup>30</sup>

<sup>1</sup>Princeton Neuroscience Institute, Princeton University, Princeton, USA

<sup>2</sup>Computer Science Department, Princeton University, Princeton, USA

<sup>3</sup>Eyewire, Boston, MA, USA

<sup>4</sup>Neurobiology Division, MRC Laboratory of Molecular Biology, Cambridge, UK

<sup>5</sup>Drosophila Connectomics Group, Department of Zoology, University of Cambridge, Cambridge, UK

<sup>6</sup>Center for the Physics of Biological Function, Princeton University, Princeton, USA

<sup>7</sup>Allen Institute for Brain Science, Seattle, USA

<sup>8</sup>Yikes LLC, Baltimore, USA

<sup>9</sup>Department of Neurobiology, University of Haifa, Haifa, Israel

<sup>10</sup>Brain & Cognitive Sciences Department, Massachusetts Institute of Technology, Cambridge, USA

<sup>11</sup>Electrical and Computer Engineering Department, Princeton University, Princeton, USA

<sup>12</sup>Harvard Medical School, Boston, USA

<sup>13</sup>Centre for Neural Circuits and Behaviour, The University of Oxford, Oxford, UK

<sup>14</sup>Janelia Research Campus, Howard Hughes Medical Institute, Ashburn, USA

<sup>15</sup>Department of Neurological Sciences, Larner College of Medicine, University of Vermont, Burlington, USA

<sup>16</sup>SixEleven, Davao City, Philippines

<sup>17</sup>ariadne.ai ag, Buchrain, Switzerland

<sup>18</sup>University of California, Santa Barbara, USA

<sup>19</sup>Freie Universität Berlin, Berlin, Germany

- <sup>20</sup>Harvard, Boston, USA
- <sup>21</sup>Department Circuits-Computation-Models, Max Planck Institute for Biological Intelligence, Planegg, Germany
- <sup>22</sup>Sungkyunkwan University, Seoul, South Korea
- <sup>23</sup>Department of Neuroscience, Yale University, New Haven, USA
- <sup>24</sup>Institute of Neurobiology, University of Puerto Rico Medical Sciences Campus, San Juan, Puerto Rico
- <sup>25</sup>Program in Neuroscience and Behavior, Mount Holyoke College, South Hadley, USA
- <sup>26</sup>Department of Biology, West Virginia University, Morgantown, USA
- <sup>27</sup>Johannes-Gutenberg University Mainz, Mainz, Germany
- <sup>28</sup>University of California, Berkeley, USA
- <sup>29</sup>University of Queensland, Brisbane, Australia
- <sup>30</sup>Julius-Maximilians-Universität Würzburg, Würzburg, Germany
- <sup>31</sup>Gwangju Institute of Science and Technology, Gwangju, South Korea
- <sup>32</sup>Stanford University School of Medicine, Stanford, USA
- <sup>33</sup>Champalimaud Foundation, Lisbon, Portugal
- <sup>34</sup>Cornell University, Ithaca, USA
- <sup>35</sup>Max Planck Florida Institute for Neuroscience, Jupiter, USA
- <sup>36</sup>University of Bonn, Bonn, Germany
- <sup>37</sup>Zuckerman Institute, Columbia University, New York, USA
- <sup>38</sup>Drexel, Philadelphia, USA
- <sup>39</sup>Seoul National University, Seoul, South Korea
- <sup>40</sup>Newcastle University, Newcastle, UK
- <sup>41</sup>RWTH Aachen University, Aachen, Germany
- <sup>42</sup>Caltech, Pasadena, USA
- <sup>43</sup>Rockefeller University, New York, USA
- <sup>44</sup>Mount Holyoke College, South Hadley, USA
- <sup>45</sup>National Hualien Senior High School, Hualien, Taiwan
- <sup>46</sup>The Francis Crick Institute, London, UK
- <sup>47</sup>Aware LLC, Zurich, Switzerland
- <sup>48</sup>University of California, Los Angeles, USA
- <sup>49</sup>Institute of Biology, Leipzig University, Leipzig, Germany
- <sup>50</sup>University of California, Merced, USA
- <sup>51</sup>University of Florida, Gainesville, USA
- <sup>52</sup>Université Côte d'Azur, CNRS, Inserm, iBV, Nice, France
- <sup>53</sup>Retired MD-PhD, Fort Collins, USA
- <sup>54</sup>University of Oxford, Oxford, UK
