# Supplementary material for: Neuronal wiring diagram of an adult brain
Source: PubMed Central journal article supplement (PMC11446842; doi:10.1038/s41586-024-07558-y), 2024-10-02
Supplement: 41586_2024_7558_MOESM4_ESM.pdf [file 41586_2024_7558_MOESM4_ESM.pdf]

## Supplementary Note

### Eyewire authors

Krzysztof Kruk<sup>3</sup>, Nikitas Serafetinidis (Nseraf)<sup>3</sup>, Anne Kristiansen<sup>3</sup>, Jaime Skelton (AzureJay)<sup>3</sup>, Thomas Stocks<sup>3</sup>, Matthew Lichtenberger (JousterL)<sup>3</sup>, Anthony Hernandez (Kfay)<sup>3</sup>, Marissa Sorek<sup>1,3</sup>, Travis R. Aiken (TR77)<sup>3</sup>, Daniel Lehmann (bl4ckscor3)<sup>3</sup>, Ryan Margossian (Hewhoamareismyself)<sup>3</sup>, Iliyan Georgiev<sup>3</sup>, Andrea N. Becker<sup>3</sup>, Ashley Morren (a5hm0r)<sup>3</sup>, Daniel Bąba (Mavil)<sup>3</sup>, Amy R. Sterling<sup>1,3</sup>

<sup>1</sup>Princeton Neuroscience Institute, Princeton University, Princeton, NJ, USA

<sup>3</sup>Eyewire, Boston, MA, USA
